# Supplementary material
Source: publisher figshare collection journal article supplement (https://acs.figshare.com/ndownloader/files/4134016)
Supplement: Supplementary file 1 [file 4134016]

# Supporting Information

Ten pages: two figures (S1, S2a-b) and two tables (S1a-c, S2)

To be submitted for publication in  
Environmental Science and Technology

## Assessing Sustainability in Real Urban Systems: The Greater Cincinnati Metropolitan Area in Ohio, Kentucky and Indiana

**Alejandra M. Gonzalez-Mejía,**<sup>1,2,3</sup>

**Tarsha N. Eason,**<sup>3</sup>

**Heriberto Cabezas,**<sup>3</sup>

**Makram T. Suidan**<sup>1,4\*</sup>

<sup>1</sup> *University of Cincinnati, College of Engineering & Applied Science, Environmental Program,  
2901 Woodside Drive, Cincinnati OH 45221, U.S.A*

<sup>2</sup> *Presently ORISE Fellow at*<sup>3</sup>

<sup>3</sup> *U.S. Environmental Protection Agency, Office of Research and Development, National Risk  
Management Research Laboratory, Sustainable Technology Division, 26 W. Martin Luther King  
Drive, Cincinnati, Ohio 45268, U.S.A*

E-mail: gonzalez.alejandra@epamail.epa.gov; phone: +1-513-569-7002; fax: +1-513-569-7677

E-mail: eason.tarsha@epa.gov; phone: +1-513-569-7974; fax: +1-513-569-7111

E-mail: cabezas.heriberto@epa.gov; phone: +1-513-569-7350; fax: +1-513-487-7787

\* Corresponding author <sup>4</sup>*American University of Beirut, Faculty of Engineering and  
Architecture, Bechtel Engineering Building, Beirut, Lebanon*

Email: msuidan@aub.edu.lb; phone: +011-961-1-347952

**Figure S1 – Area of study: Cincinnati Metropolitan Statistical Area OH-KY-IN, suburbs, and city boundaries**

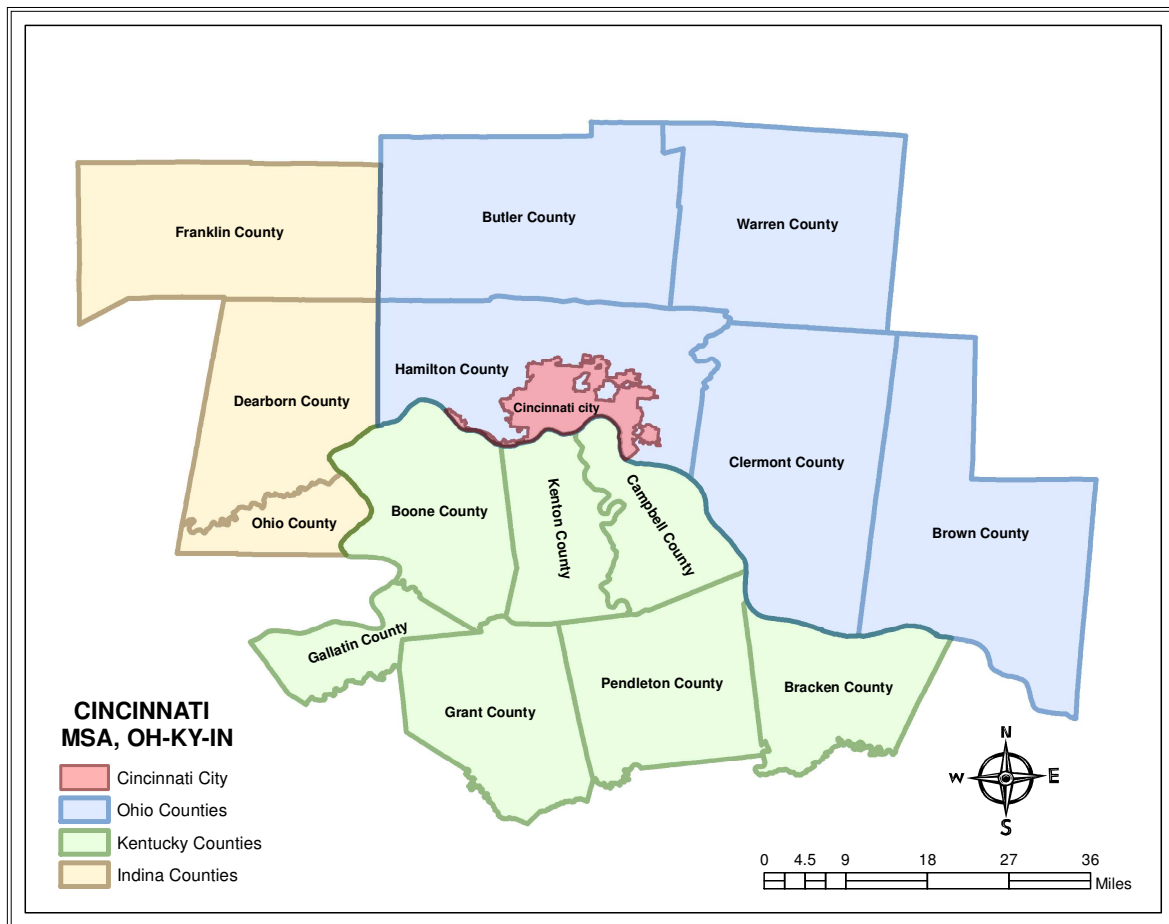

Please note that the area outside of the City of Cincinnati's perimeter (red line) within the boundaries of the MSA is considered the suburbs.

Figure S2a – Goodness of the fit for social and economic components of Cincinnati MSA

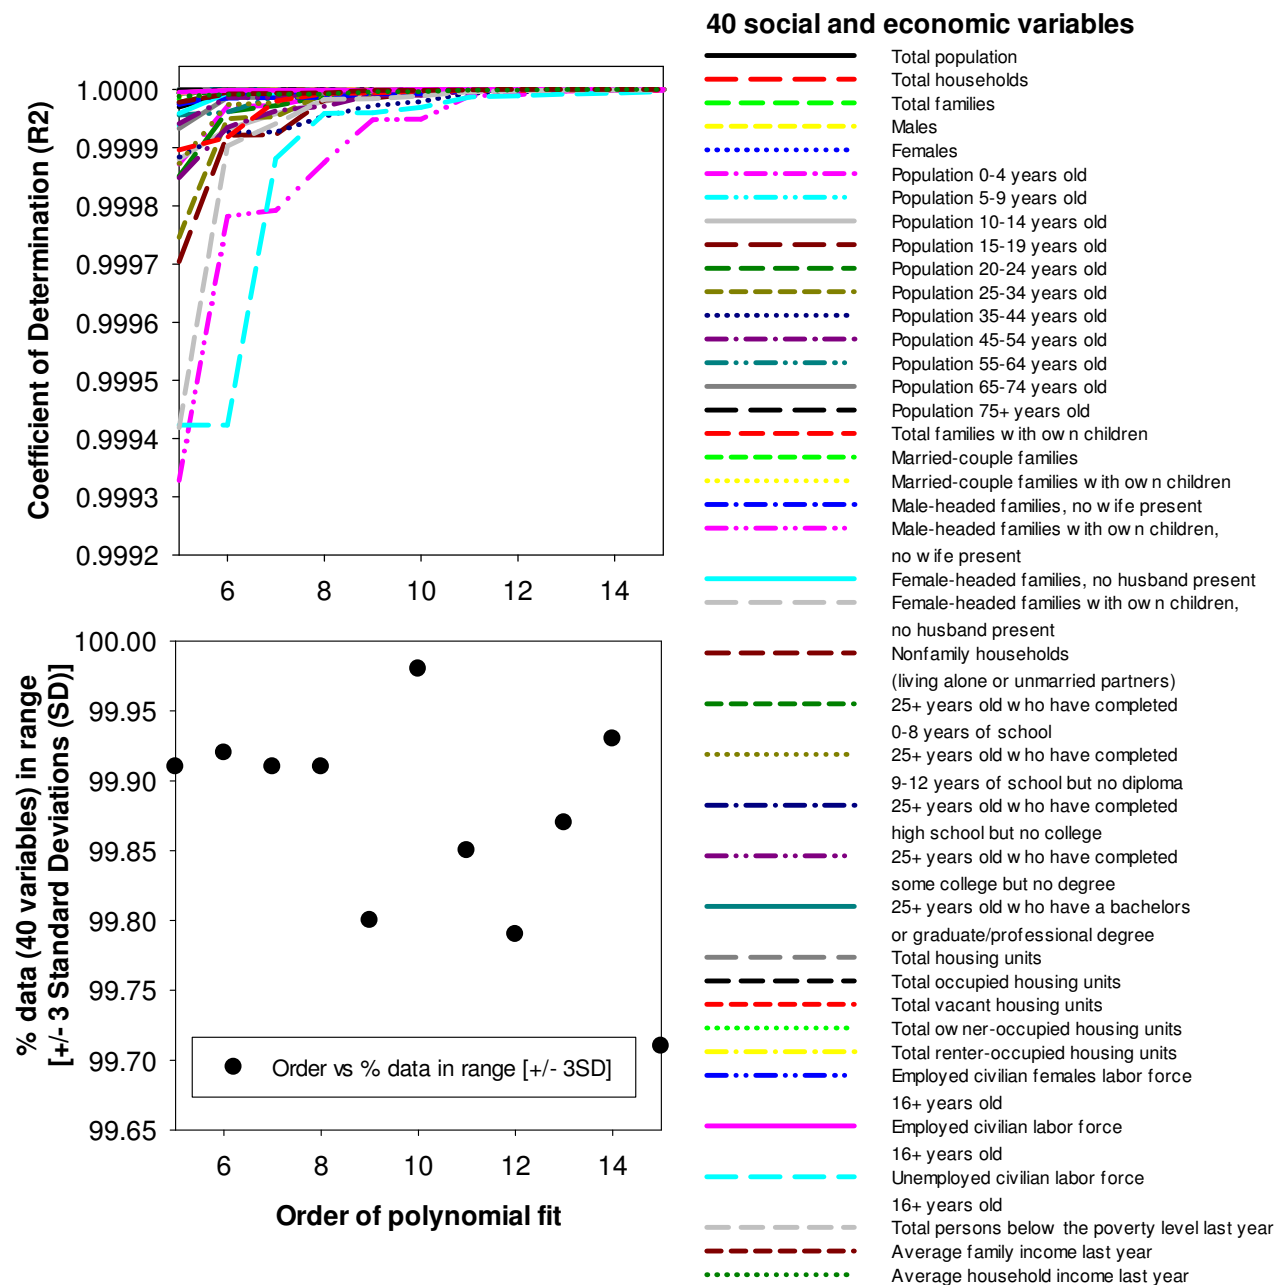

Figure S2b – Goodness of the fit for air quality variables of Cincinnati MSA

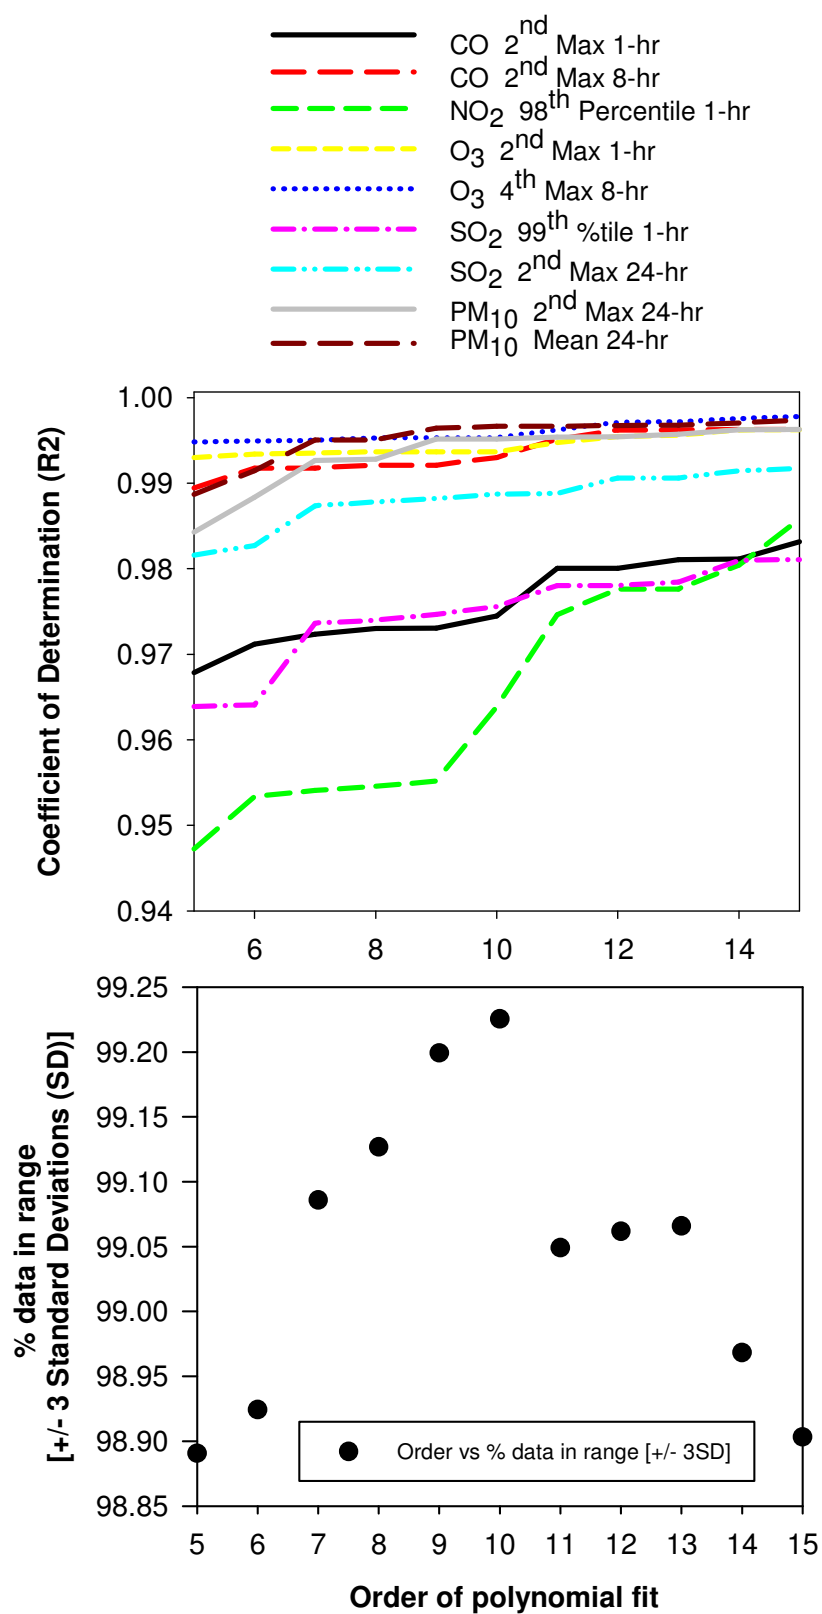

**Table S1a – Social, economic characteristics describing Cincinnati MSA**

|                               |    |                                                                              | Cincinnati-Middletown, OH-KY-IN MSA |              |              |              |              |
|-------------------------------|----|------------------------------------------------------------------------------|-------------------------------------|--------------|--------------|--------------|--------------|
|                               |    | <b>SOCIAL COMPONENT</b>                                                      | <b>1,970</b>                        | <b>1,980</b> | <b>1,990</b> | <b>2,000</b> | <b>2,009</b> |
| <b>SOCIAL DISTRIBUTION</b>    | 1  | Total population                                                             | 1,603,304                           | 1,659,795    | 1,844,793    | 2,009,632    | 2,170,828    |
|                               | 2  | Total households                                                             | 495,772                             | 587,616      | 688,102      | 779,534      | 816,646      |
|                               | 3  | Total families                                                               | 399,168                             | 432,832      | 488,694      | 528,257      | 540,998      |
|                               | 4  | Males                                                                        | 770,200                             | 796,734      | 886,932      | 976,123      | 1,060,510    |
|                               | 5  | Females                                                                      | 833,117                             | 863,069      | 957,870      | 1,033,509    | 1,110,318    |
| <b>AGE DISTRIBUTION</b>       | 6  | Population 0-4 years old                                                     | 142,195                             | 125,330      | 143,023      | 141,143      | 147,949      |
|                               | 7  | Population 5-9 years old                                                     | 165,738                             | 126,696      | 143,404      | 149,461      | 148,208      |
|                               | 8  | Population 10-14 years old                                                   | 171,891                             | 137,692      | 132,341      | 152,871      | 146,326      |
|                               | 9  | Population 15-19 years old                                                   | 152,643                             | 159,420      | 132,286      | 144,835      | 152,208      |
|                               | 10 | Population 20-24 years old                                                   | 124,057                             | 160,743      | 137,365      | 133,837      | 136,452      |
|                               | 11 | Population 25-34 years old                                                   | 193,003                             | 268,486      | 322,779      | 280,935      | 299,744      |
|                               | 12 | Population 35-44 years old                                                   | 186,428                             | 183,092      | 274,185      | 335,658      | 300,554      |
|                               | 13 | Population 45-54 years old                                                   | 175,557                             | 169,972      | 184,468      | 270,330      | 331,425      |
|                               | 14 | Population 55-64 years old                                                   | 140,657                             | 152,995      | 157,580      | 165,331      | 243,080      |
|                               | 15 | Population 65-74 years old                                                   | 92,855                              | 105,572      | 125,839      | 127,897      | 139,388      |
|                               | 16 | Population 75+ years old                                                     | 58,293                              | 69,805       | 91,532       | 107,334      | 125,494      |
| <b>HOUSEHOLD TYPE</b>         | 17 | Total families with own children                                             | 237,307                             | 241,403      | 262,487      | 280,151      | 253,046      |
|                               | 18 | Married-couple families                                                      | 344,466                             | 358,468      | 387,973      | 409,070      | 402,552      |
|                               | 19 | Married-couple families with own children                                    | 201,140                             | 189,756      | 189,864      | 194,893      | 171,613      |
|                               | 20 | Male-headed families, no wife present                                        | 10,999                              | 12,787       | 19,178       | 27,813       | 31,489       |
|                               | 21 | Male-headed families with own children, no wife present                      | 3,778                               | 4,957        | 8,740        | 15,092       | 14,476       |
|                               | 22 | Female-headed families, no husband present                                   | 43,709                              | 61,579       | 81,540       | 91,374       | 106,957      |
|                               | 23 | Female-headed families with own children, no husband present                 | 23,517                              | 37,427       | 48,203       | 57,218       | 66,957       |
|                               | 24 | Nonfamily households (living alone or unmarried partners)                    | 98,076                              | 154,121      | 199,409      | 251,277      | 275,648      |
| <b>EDUCATIONAL ATTAINMENT</b> | 25 | Persons 25+ years old who have completed 0-8 years of school                 | 254,075                             | 175,770      | 108,569      | 65,339       | 52,308       |
|                               | 26 | Persons 25+ years old who have completed 9-12 years of school but no diploma | 183,172                             | 170,628      | 186,925      | 160,677      | 126,554      |
|                               | 27 | Persons 25+ years old who have completed high school but no college          | 248,892                             | 333,080      | 368,381      | 410,581      | 455,199      |
|                               | 28 | Persons 25+ years old who have completed some college but no degree          | 73,124                              | 122,347      | 201,885      | 253,198      | 294,936      |
|                               | 29 | Persons 25+ years old who have a bachelors or graduate/professional degree   | 87,509                              | 148,105      | 225,691      | 319,469      | 410,853      |

**Table S1a - Social and economic characteristics describing Cincinnati MSA**

|                             |                    |                                                      | Cincinnati-Middletown, OH-KY-IN MSA |         |         |         |           |
|-----------------------------|--------------------|------------------------------------------------------|-------------------------------------|---------|---------|---------|-----------|
| HOUSING TENURE              | ECONOMIC COMPONENT |                                                      | 1,970                               | 1,980   | 1,990   | 2,000   | 2,009     |
|                             | 30                 | Total housing units                                  | 519,401                             | 622,996 | 732,526 | 833,067 | 917,060   |
|                             | 31                 | Total occupied housing units                         | 495,772                             | 586,792 | 688,607 | 779,226 | 816,646   |
|                             | 32                 | Total vacant housing units                           | 23,628                              | 36,210  | 43,922  | 53,841  | 100,414   |
|                             | 33                 | Total owner-occupied housing units                   | 311,590                             | 385,394 | 445,714 | 524,084 | 557,021   |
|                             | 34                 | Total renter-occupied housing units                  | 184,192                             | 212,527 | 242,894 | 255,142 | 259,625   |
| EMPLOYMENT STATUS & POVERTY | 35                 | Employed civilian females labor force, 16+ years old | 221,529                             | 298,274 | 403,411 | 462,721 | 503,313   |
|                             | 36                 | Employed civilian labor force, 16+ years old         | 604,489                             | 711,662 | 872,197 | 982,727 | 1,034,562 |
|                             | 37                 | Unemployed civilian labor force, 16+ years old       | 23,689                              | 53,645  | 47,790  | 43,624  | 111,175   |
|                             | 38                 | Total persons below the poverty level last year      | 163,461                             | 165,930 | 206,999 | 186,697 | 273,524   |
| INCOME                      | 39                 | Average family income last year(\$)                  | 11,526                              | 24,212  | 44,179  | 68,543  | 81,871    |
|                             | 40                 | Average household income last year (\$)              | 10,326                              | 19,758  | 38,000  | 58,407  | 68,762    |

Each area under study (i.e., MSA, suburbs, and city of Cincinnati) is divided by component (i.e., social and economic) and corresponding sub-components (e.g., social distribution, housing occupancy, etc.)

**Table S1b - Social and economic characteristics describing the City of Cincinnati**

|                               |    |                                                                              | Cincinnati City, OH |              |              |              |              |
|-------------------------------|----|------------------------------------------------------------------------------|---------------------|--------------|--------------|--------------|--------------|
|                               |    | <b>SOCIAL COMPONENT</b>                                                      | <b>1,970</b>        | <b>1,980</b> | <b>1,990</b> | <b>2,000</b> | <b>2,009</b> |
| <b>SOCIAL DISTRIBUTION</b>    | 1  | Total population                                                             | 452,060             | 390,166      | 368,120      | 336,966      | 333,013      |
|                               | 2  | Total households                                                             | 159,589             | 159,331      | 155,760      | 150,268      | 138,857      |
|                               | 3  | Total families                                                               | 109,313             | 92,653       | 84,597       | 74,577       | 63,054       |
|                               | 4  | Males                                                                        | 210,514             | 180,764      | 172,378      | 159,681      | 161,344      |
|                               | 5  | Females                                                                      | 244,020             | 211,514      | 197,749      | 178,988      | 171,669      |
| <b>AGE DISTRIBUTION</b>       | 6  | Population 0-4 years old                                                     | 38,471              | 29,094       | 30,753       | 24,219       | 24,821       |
|                               | 7  | Population 5-9 years old                                                     | 39,022              | 25,734       | 27,100       | 23,778       | 19,490       |
|                               | 8  | Population 10-14 years old                                                   | 41,204              | 25,934       | 22,174       | 22,852       | 17,566       |
|                               | 9  | Population 15-19 years old                                                   | 40,586              | 34,255       | 24,837       | 23,680       | 26,097       |
|                               | 10 | Population 20-24 years old                                                   | 44,597              | 47,046       | 34,442       | 31,509       | 30,282       |
|                               | 11 | Population 25-34 years old                                                   | 53,141              | 67,129       | 72,013       | 56,413       | 59,504       |
|                               | 12 | Population 35-44 years old                                                   | 43,887              | 33,391       | 48,205       | 51,009       | 37,877       |
|                               | 13 | Population 45-54 years old                                                   | 46,845              | 35,102       | 29,423       | 39,621       | 47,443       |
|                               | 14 | Population 55-64 years old                                                   | 47,740              | 37,596       | 29,179       | 23,429       | 31,013       |
|                               | 15 | Population 65-74 years old                                                   | 35,259              | 32,802       | 26,986       | 20,708       | 17,715       |
|                               | 16 | Population 75+ years old                                                     | 23,782              | 24,195       | 25,015       | 21,451       | 21,205       |
| <b>HOUSEHOLD TYPE</b>         | 17 | Total families with own children                                             | 57,229              | 48,224       | 47,280       | 41,805       | 29,545       |
|                               | 18 | Married-couple families                                                      | 85,787              | 64,572       | 51,795       | 41,547       | 33,873       |
|                               | 19 | Married-couple families with own children                                    | 41,950              | 28,719       | 22,800       | 17,599       | 12,590       |
|                               | 20 | Male-headed families, no wife present                                        | 3,753               | 3,968        | 4,522        | 5,519        | 5,050        |
|                               | 21 | Male-headed families with own children, no wife present                      | 1,100               | 1,341        | 1,937        | 2,780        | 2,027        |
|                               | 22 | Female-headed families, no husband present                                   | 19,772              | 24,114       | 28,281       | 27,511       | 24,131       |
|                               | 23 | Female-headed families with own children, no husband present                 | 11,154              | 15,158       | 18,141       | 18,704       | 14,928       |
|                               | 24 | Nonfamily households (living alone or unmarried partners)                    | 50,508              | 66,660       | 71,162       | 75,691       | 75,803       |
| <b>EDUCATIONAL ATTAINMENT</b> | 25 | Persons 25+ years old who have completed 0-8 years of school                 | 452,060             | 390,166      | 368,120      | 336,966      | 333,013      |
|                               | 26 | Persons 25+ years old who have completed 9-12 years of school but no diploma | 159,589             | 159,331      | 155,760      | 150,268      | 138,857      |
|                               | 27 | Persons 25+ years old who have completed high school but no college          | 109,313             | 92,653       | 84,597       | 74,577       | 63,054       |
|                               | 28 | Persons 25+ years old who have completed some college but no degree          | 210,514             | 180,764      | 172,378      | 159,681      | 161,344      |
|                               | 29 | Persons 25+ years old who have a bachelors or graduate/professional degree   | 244,020             | 211,514      | 197,749      | 178,988      | 171,669      |

**Table S1b - Social and economic characteristics describing the City of Cincinnati**

|                             |    |                                                      | Cincinnati City, OH |         |         |         |         |
|-----------------------------|----|------------------------------------------------------|---------------------|---------|---------|---------|---------|
|                             |    | ECONOMIC COMPONENT                                   | 1,970               | 1,980   | 1,990   | 2,000   | 2,009   |
| HOUSING TENURE              | 30 | Total housing units                                  | 83,079              | 50,328  | 23,617  | 12,141  | 9,456   |
|                             | 31 | Total occupied housing units                         | 56,864              | 46,036  | 46,012  | 36,749  | 26,101  |
|                             | 32 | Total vacant housing units                           | 60,127              | 63,396  | 57,483  | 54,983  | 53,511  |
|                             | 33 | Total owner-occupied housing units                   | 20,546              | 28,961  | 39,424  | 39,905  | 44,529  |
|                             | 34 | Total renter-occupied housing units                  | 28,482              | 40,101  | 50,702  | 56,453  | 68,688  |
| EMPLOYMENT STATUS & POVERTY | 35 | Employed civilian females labor force, 16+ years old | 173,039             | 174,856 | 171,559 | 169,024 | 172,434 |
|                             | 36 | Employed civilian labor force, 16+ years old         | 160,479             | 159,903 | 156,748 | 150,982 | 138,857 |
|                             | 37 | Unemployed civilian labor force, 16+ years old       | 12,560              | 14,953  | 14,811  | 18,042  | 33,577  |
|                             | 38 | Total persons below the poverty level last year      | 66,269              | 64,123  | 61,592  | 60,186  | 55,270  |
| INCOME                      | 39 | Average family income last year(\$)                  | 94,214              | 96,722  | 95,160  | 90,796  | 83,587  |
|                             | 40 | Average household income last year (\$)              | 73,757              | 74,643  | 79,700  | 76,632  | 76,801  |



**Table S1c - Social and economic characteristics describing the Suburbs of Cincinnati**

|                               |    |                                                                              | Cincinnati suburbs, OH-KY-IN |              |              |              |              |
|-------------------------------|----|------------------------------------------------------------------------------|------------------------------|--------------|--------------|--------------|--------------|
|                               |    | <b>SOCIAL COMPONENT</b>                                                      | <b>1,970</b>                 | <b>1,980</b> | <b>1,990</b> | <b>2,000</b> | <b>2,009</b> |
| <b>SOCIAL DISTRIBUTION</b>    | 1  | Total population                                                             | 1,151,244                    | 1,269,629    | 1,476,673    | 1,672,666    | 1,837,815    |
|                               | 2  | Total households                                                             | 336,183                      | 428,285      | 532,342      | 629,266      | 677,789      |
|                               | 3  | Total families                                                               | 289,855                      | 340,179      | 404,097      | 453,680      | 477,944      |
|                               | 4  | Males                                                                        | 559,686                      | 615,970      | 714,554      | 816,442      | 899,166      |
|                               | 5  | Females                                                                      | 589,097                      | 651,555      | 760,121      | 854,521      | 938,649      |
| <b>AGE DISTRIBUTION</b>       | 6  | Population 0-4 years old                                                     | 103,724                      | 96,236       | 112,270      | 116,924      | 123,128      |
|                               | 7  | Population 5-9 years old                                                     | 126,716                      | 100,962      | 116,304      | 125,683      | 128,718      |
|                               | 8  | Population 10-14 years old                                                   | 130,687                      | 111,758      | 110,167      | 130,019      | 128,760      |
|                               | 9  | Population 15-19 years old                                                   | 112,057                      | 125,165      | 107,449      | 121,155      | 126,111      |
|                               | 10 | Population 20-24 years old                                                   | 79,460                       | 113,697      | 102,923      | 102,328      | 106,170      |
|                               | 11 | Population 25-34 years old                                                   | 139,862                      | 201,357      | 250,766      | 224,522      | 240,240      |
|                               | 12 | Population 35-44 years old                                                   | 142,541                      | 149,701      | 225,980      | 284,649      | 262,677      |
|                               | 13 | Population 45-54 years old                                                   | 128,712                      | 134,870      | 155,045      | 230,709      | 283,982      |
|                               | 14 | Population 55-64 years old                                                   | 92,917                       | 115,399      | 128,401      | 141,902      | 212,067      |
|                               | 15 | Population 65-74 years old                                                   | 57,596                       | 72,770       | 98,853       | 107,189      | 121,673      |
|                               | 16 | Population 75+ years old                                                     | 34,511                       | 45,610       | 66,517       | 85,883       | 104,289      |
| <b>HOUSEHOLD TYPE</b>         | 17 | Total families with own children                                             | 180,078                      | 193,179      | 215,207      | 238,346      | 223,501      |
|                               | 18 | Married-couple families                                                      | 258,679                      | 293,896      | 336,178      | 367,523      | 368,679      |
|                               | 19 | Married-couple families with own children                                    | 159,190                      | 161,037      | 167,064      | 177,294      | 159,023      |
|                               | 20 | Male-headed families, no wife present                                        | 7,246                        | 8,819        | 14,656       | 22,294       | 26,439       |
|                               | 21 | Male-headed families with own children, no wife present                      | 2,678                        | 3,616        | 6,803        | 12,312       | 12,449       |
|                               | 22 | Female-headed families, no husband present                                   | 23,937                       | 37,465       | 53,259       | 63,863       | 82,826       |
|                               | 23 | Female-headed families with own children, no husband present                 | 12,363                       | 22,269       | 30,062       | 38,514       | 52,029       |
|                               | 24 | Nonfamily households (living alone or unmarried partners)                    | 47,568                       | 87,461       | 128,247      | 175,586      | 199,845      |
| <b>EDUCATIONAL ATTAINMENT</b> | 25 | Persons 25+ years old who have completed 0-8 years of school                 | 1,151,244                    | 1,269,629    | 1,476,673    | 1,672,666    | 1,837,815    |
|                               | 26 | Persons 25+ years old who have completed 9-12 years of school but no diploma | 336,183                      | 428,285      | 532,342      | 629,266      | 677,789      |
|                               | 27 | Persons 25+ years old who have completed high school but no college          | 289,855                      | 340,179      | 404,097      | 453,680      | 477,944      |
|                               | 28 | Persons 25+ years old who have completed some college but no degree          | 559,686                      | 615,970      | 714,554      | 816,442      | 899,166      |
|                               | 29 | Persons 25+ years old who have a bachelors or graduate/professional degree   | 589,097                      | 651,555      | 760,121      | 854,521      | 938,649      |

**Table S1c - Social and economic characteristics describing the Suburbs of Cincinnati**

|                             |    |                                                      | Cincinnati suburbs, OH-KY-IN        |         |         |         |         |         |
|-----------------------------|----|------------------------------------------------------|-------------------------------------|---------|---------|---------|---------|---------|
| HOUSING TENURE              |    | ECONOMIC COMPONENT                                   | 1,970                               | 1,980   | 1,990   | 2,000   | 2,009   |         |
|                             |    | 30                                                   | Total housing units                 | 170,996 | 125,442 | 84,952  | 53,198  | 42,852  |
|                             |    | 31                                                   | Total occupied housing units        | 126,308 | 124,592 | 140,913 | 123,928 | 100,453 |
|                             |    | 32                                                   | Total vacant housing units          | 188,765 | 269,684 | 310,898 | 355,598 | 401,688 |
|                             |    | 33                                                   | Total owner-occupied housing units  | 52,578  | 93,386  | 162,461 | 213,293 | 250,407 |
|                             |    | 34                                                   | Total renter-occupied housing units | 59,027  | 108,004 | 174,989 | 263,016 | 342,165 |
| EMPLOYMENT STATUS & POVERTY | 35 | Employed civilian females labor force, 16+ years old | 346,362                             | 448,140 | 560,967 | 664,043 | 744,626 |         |
|                             | 36 | Employed civilian labor force, 16+ years old         | 335,293                             | 426,889 | 531,859 | 628,244 | 677,789 |         |
|                             | 37 | Unemployed civilian labor force, 16+ years old       | 11,068                              | 21,257  | 29,111  | 35,799  | 66,837  |         |
|                             | 38 | Total persons below the poverty level last year      | 245,321                             | 321,271 | 384,122 | 463,898 | 501,751 |         |
| INCOME                      | 39 | Average family income last year(\$)                  | 89,978                              | 115,805 | 147,734 | 164,346 | 176,038 |         |
|                             | 40 | Average household income last year (\$)              | 147,772                             | 223,631 | 323,711 | 386,089 | 426,512 |         |

Time series for the suburban area of Cincinnati, OH-KY-IN were obtained subtracting the City values from the MSA.

**Table 2 - Air quality variables for Cincinnati, OH-KY-IN**

| Year | CO<br>2 <sup>nd</sup> Max<br>1-hr<br>(ppm) | CO<br>2 <sup>nd</sup> Max<br>8-hr<br>(ppm) | NO <sub>2</sub><br>98 <sup>th</sup><br>Percentile<br>1-hr<br>(ppb) | O <sub>3</sub><br>2 <sup>nd</sup> Max<br>1-hr<br>(ppm) | O <sub>3</sub><br>4 <sup>th</sup> Max<br>8-hr<br>(ppm) | SO <sub>2</sub><br>99 <sup>th</sup><br>Percentile<br>1-hr<br>(ppb) | SO <sub>2</sub><br>2 <sup>nd</sup> Max<br>24-hr<br>(ppb) | PM <sub>10</sub><br>2 <sup>nd</sup> Max<br>24-hr<br>(µg/m <sup>3</sup> ) | PM <sub>10</sub><br>Mean<br>24-hr<br>(µg/m <sup>3</sup> ) |
|------|--------------------------------------------|--------------------------------------------|--------------------------------------------------------------------|--------------------------------------------------------|--------------------------------------------------------|--------------------------------------------------------------------|----------------------------------------------------------|--------------------------------------------------------------------------|-----------------------------------------------------------|
| 1980 | 10.0                                       | 6.0                                        | 144                                                                | 0.160                                                  | 0.110                                                  | 496                                                                | 105                                                      |                                                                          |                                                           |
| 1981 | 13.5                                       | 9.6                                        | 110                                                                | 0.130                                                  | 0.096                                                  | 359                                                                | 106                                                      |                                                                          |                                                           |
| 1982 | 13.7                                       | 7.7                                        | 145                                                                | 0.130                                                  | 0.101                                                  | 438                                                                | 96                                                       |                                                                          |                                                           |
| 1983 | 10.5                                       | 6.9                                        | 265                                                                | 0.150                                                  | 0.115                                                  | 432                                                                | 91                                                       | 32                                                                       | 24                                                        |
| 1984 | 13.5                                       | 7.4                                        | 110                                                                | 0.140                                                  | 0.100                                                  | 302                                                                | 78                                                       | 76                                                                       | 30                                                        |
| 1985 | 12.5                                       | 7.2                                        | 100                                                                | 0.120                                                  | 0.094                                                  | 214                                                                | 88                                                       | 80                                                                       | 45                                                        |
| 1986 | 16.0                                       | 6.1                                        | 90                                                                 | 0.130                                                  | 0.097                                                  | 345                                                                | 76                                                       | 88                                                                       | 47                                                        |
| 1987 | 10.0                                       | 6.1                                        | 100                                                                | 0.150                                                  | 0.109                                                  | 353                                                                | 76                                                       | 107                                                                      | 45                                                        |
| 1988 | 7.5                                        | 4.6                                        | 115                                                                | 0.170                                                  | 0.130                                                  | 286                                                                | 61                                                       | 124                                                                      | 44                                                        |
| 1989 | 10.0                                       | 5.3                                        | 93                                                                 | 0.120                                                  | 0.100                                                  | 287                                                                | 84                                                       | 116                                                                      | 50                                                        |
| 1990 | 7.4                                        | 4.8                                        | 88                                                                 | 0.150                                                  | 0.104                                                  | 303                                                                | 75                                                       | 108                                                                      | 41                                                        |
| 1991 | 6.3                                        | 4.9                                        | 85                                                                 | 0.140                                                  | 0.106                                                  | 491                                                                | 99                                                       | 87                                                                       | 40                                                        |
| 1992 | 11.3                                       | 4.9                                        | 72                                                                 | 0.100                                                  | 0.081                                                  | 275                                                                | 55                                                       | 82                                                                       | 36                                                        |
| 1993 | 7.0                                        | 4.8                                        | 75                                                                 | 0.120                                                  | 0.096                                                  | 249                                                                | 65                                                       | 90                                                                       | 35                                                        |
| 1994 | 7.1                                        | 4.7                                        | 82                                                                 | 0.130                                                  | 0.103                                                  | 237                                                                | 52                                                       | 90                                                                       | 35                                                        |
| 1995 | 8.6                                        | 4.0                                        | 89                                                                 | 0.130                                                  | 0.101                                                  | 148                                                                | 27                                                       | 99                                                                       | 39                                                        |
| 1996 | 6.0                                        | 3.3                                        | 79                                                                 | 0.120                                                  | 0.095                                                  | 206                                                                | 45                                                       | 78                                                                       | 32                                                        |
| 1997 | 4.6                                        | 3.1                                        | 80                                                                 | 0.120                                                  | 0.094                                                  | 226                                                                | 45                                                       | 94                                                                       | 41                                                        |
| 1998 | 5.8                                        | 4.4                                        | 93                                                                 | 0.120                                                  | 0.099                                                  | 161                                                                | 40                                                       | 84                                                                       | 36                                                        |
| 1999 | 4.9                                        | 3.0                                        | 89                                                                 | 0.120                                                  | 0.096                                                  | 134                                                                | 30                                                       | 85                                                                       | 31                                                        |
| 2000 | 4.9                                        | 2.4                                        | 72                                                                 | 0.110                                                  | 0.093                                                  | 179                                                                | 53                                                       | 70                                                                       | 32                                                        |
| 2001 | 4.5                                        | 2.9                                        | 65                                                                 | 0.120                                                  | 0.088                                                  | 168                                                                | 42                                                       | 68                                                                       | 30                                                        |
| 2002 | 5.7                                        | 2.6                                        | 72                                                                 | 0.130                                                  | 0.102                                                  | 245                                                                | 43                                                       | 59                                                                       | 26                                                        |
| 2003 | 3.0                                        | 1.9                                        | 61                                                                 | 0.120                                                  | 0.095                                                  | 181                                                                | 40                                                       | 63                                                                       | 29                                                        |
| 2004 | 5.8                                        | 2.8                                        | 57                                                                 | 0.100                                                  | 0.081                                                  | 237                                                                | 51                                                       | 53                                                                       | 25                                                        |
| 2005 | 3.2                                        | 1.8                                        | 71                                                                 | 0.120                                                  | 0.092                                                  | 166                                                                | 36                                                       | 59                                                                       | 28                                                        |
| 2006 | 9.9                                        | 3.0                                        | 56                                                                 | 0.110                                                  | 0.086                                                  | 108                                                                | 28                                                       | 55                                                                       | 24                                                        |
| 2007 | 4.1                                        | 2.8                                        | 61                                                                 | 0.110                                                  | 0.091                                                  | 99                                                                 | 22                                                       | 55                                                                       | 26                                                        |
| 2008 | 5.1                                        | 2.7                                        | 58                                                                 | 0.110                                                  | 0.086                                                  | 83                                                                 | 19                                                       | 47                                                                       | 23                                                        |
| 2009 | 1.9                                        | 1.1                                        | 50                                                                 | 0.090                                                  | 0.077                                                  | 60                                                                 | 18                                                       | 48                                                                       | 22                                                        |

Values in red are above the maximum limit established in the National Ambient Air Quality Standards – NAAQS.
